# Supplementary material for: Associations between Environmental Tobacco Smoke Exposure in Early Life and Astigmatism among Chinese Preschool Children
Source: Int J Environ Res Public Health. 2019 Oct 3;16(19):3725. doi: 10.3390/ijerph16193725 (PMC6801470; doi:10.3390/ijerph16193725)
Supplement: Supplementary file 1 [file ijerph-16-03725-s001.pdf]

## Supplemental Materials

### Contents

**Fig. S1.** Directed acyclic graph for the association between environmental tobacco smoke exposure in early life and astigmatism, showing all potential confounders. Pink lines indicate potential confounders.

**Fig. S2.** Directed acyclic graph for the association between environmental tobacco smoke exposure in early life and astigmatism, showing only confounders retained in the final models. Pink lines indicate potential confounders.

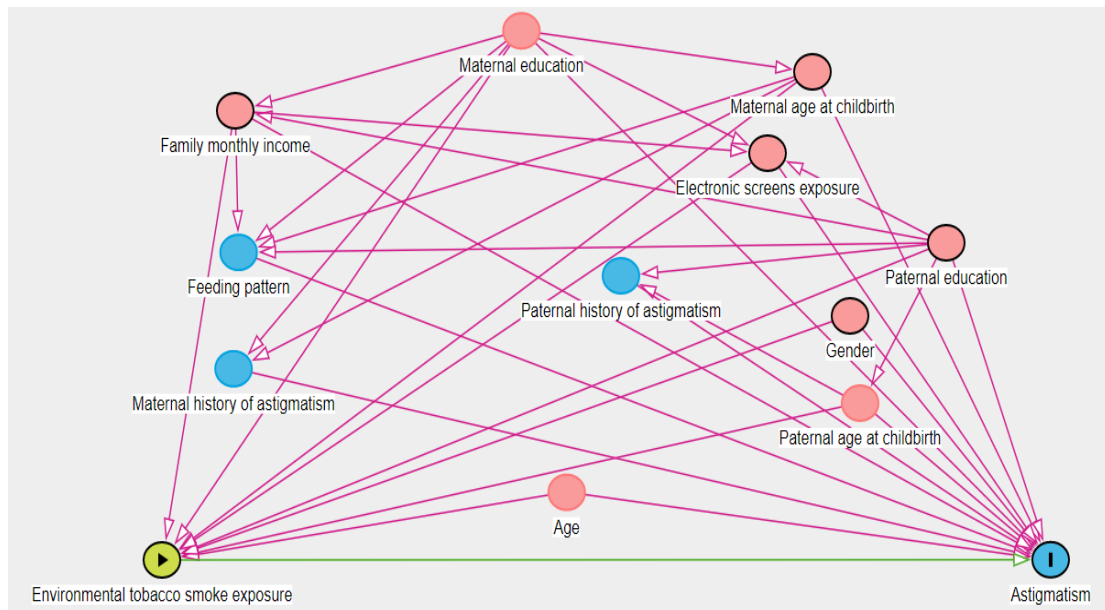

**Fig. S1.** Directed acyclic graph for the association between environmental tobacco smoke exposure in early life and astigmatism, showing all potential confounders. Pink lines indicate potential confounders.

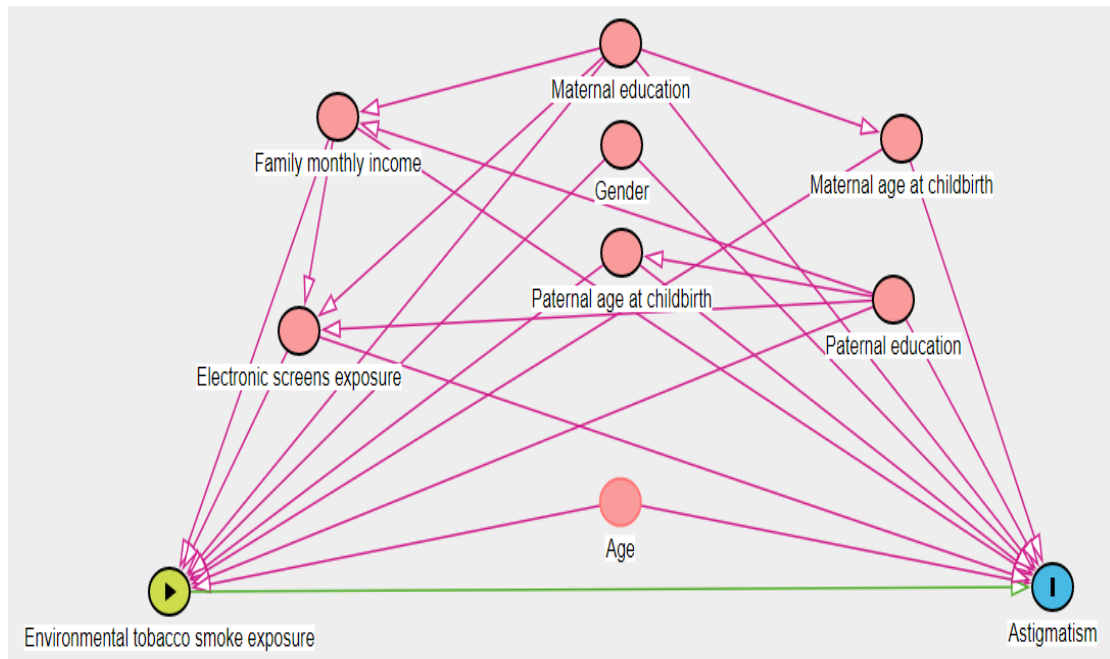

**Fig. S2.** Directed acyclic graph for the association between environmental tobacco smoke exposure in early life and astigmatism, showing only confounders retained in the final models. Pink lines indicate potential confounders.
